# Supplementary material
Source: publisher figshare collection journal article supplement (https://aacr.figshare.com/ndownloader/files/42659829)
Supplement: Supplementary file 1 [file 42659829]

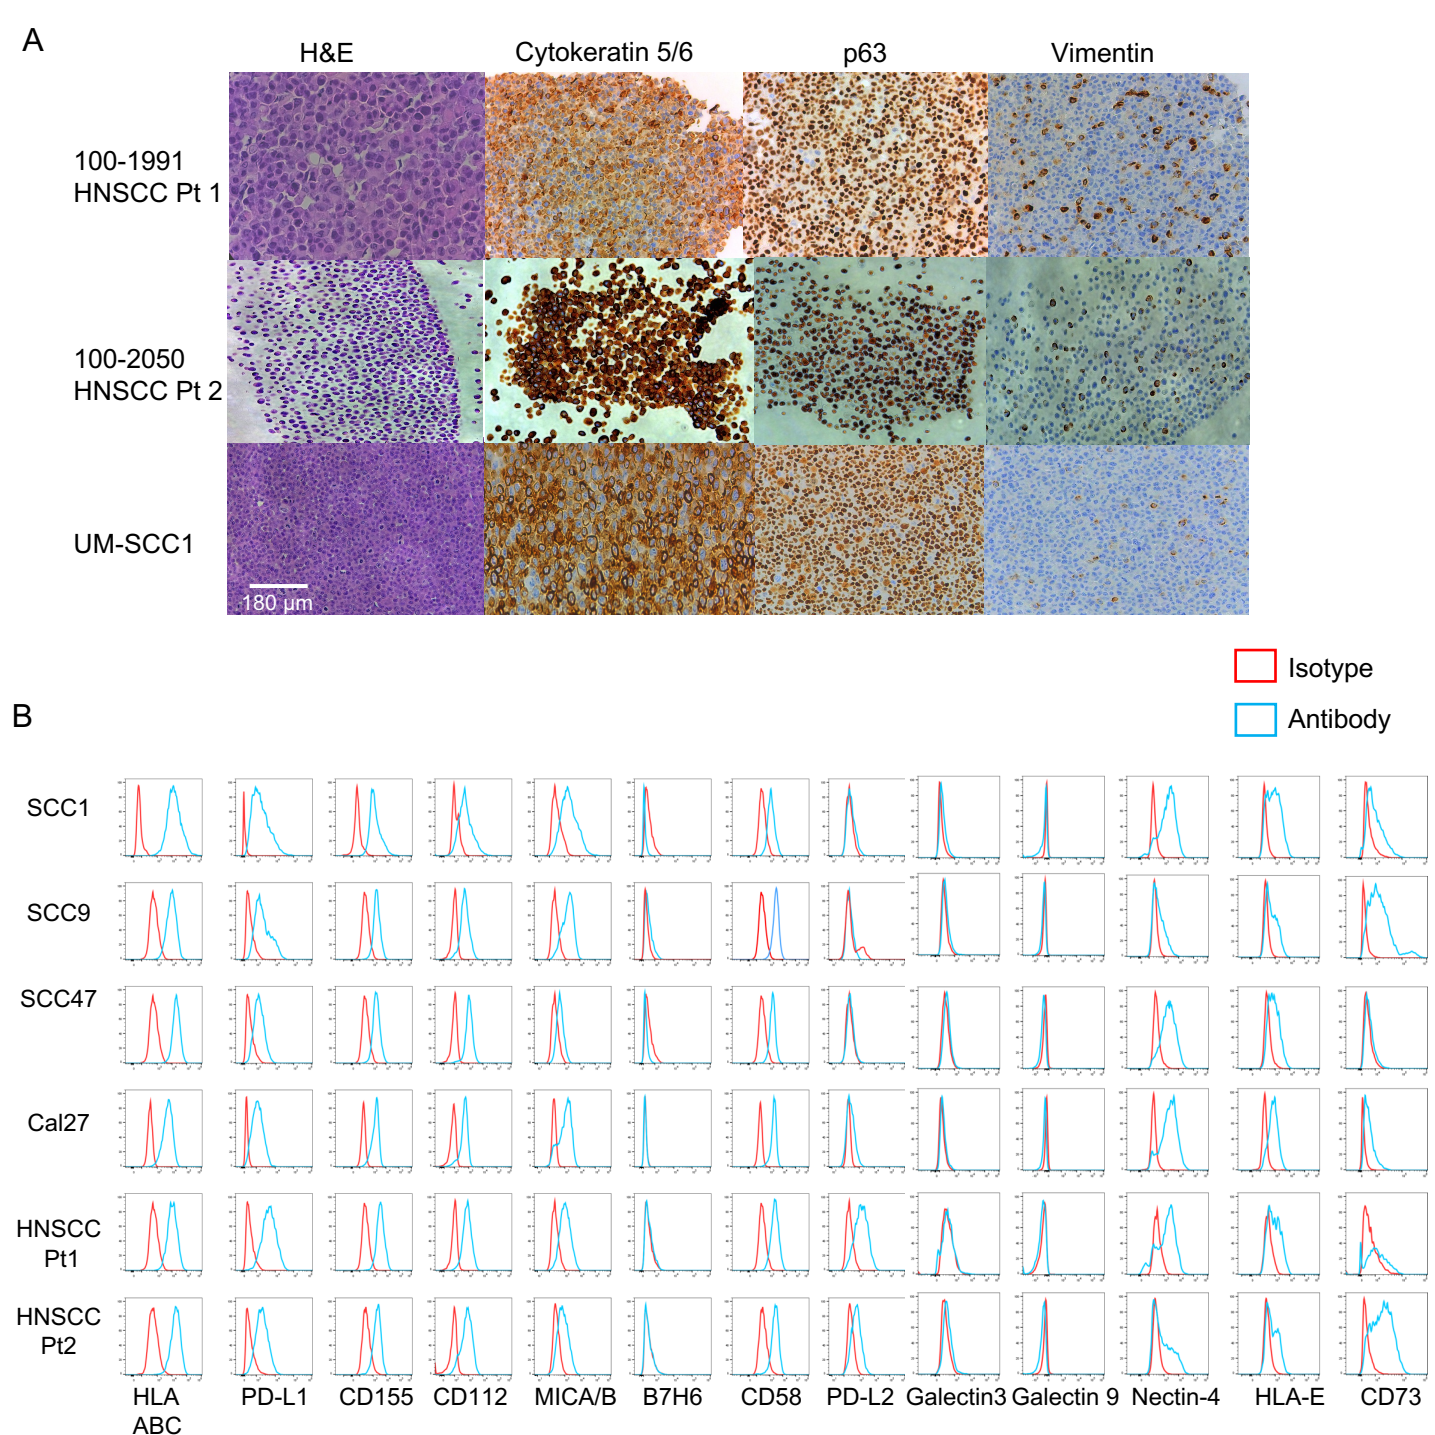

**Supplementary Figure 2. HNSCC cell lines and patient samples express multiple inhibitory and activating surface ligands. (A)** Patient derived cell lines from two HNSCC patients were generated and used as allogenic targets for functional assays and cytotoxicity assays. Patient derived cell lines and UM-SCC1 cell line were stained with hemotoxin eosinophilia (H&E), cytokeratin 5/6 or p63 to identify tumor cells or vimentin to identify fibroblasts. **(B)** Phenotypic characterization of HNSCC cell lines and patient samples was performed using flow cytometry. Histograms represent cell surface expression of the indicated protein (blue) compared to isotype control (red).
